# Supplementary material
Source: Research Square preprint supplement (doi:10.21203/rs.3.rs-8708160/v1)

# 湖南医药学院总医院伦理审查委员会

## 伦理审查批件

批件号： 快 KY-2026010601

|       |                                                                                                                                                                                                                     |       |       |        |    |
|-------|---------------------------------------------------------------------------------------------------------------------------------------------------------------------------------------------------------------------|-------|-------|--------|----|
| 项目名称  | 临床适应性与科研时间对双轨合一下专硕胜任力的影响研究                                                                                                                                                                                          |       |       |        |    |
| 临床批件号 | NA                                                                                                                                                                                                                  | 注册分类  | NA    | 临床试验分期 | NA |
| 申办者   | 湖南医药学院总医院                                                                                                                                                                                                           |       | 组长单位  | NA     |    |
| 项目类别  | 科研项目                                                                                                                                                                                                                |       | 审查类别  | 初始审查   |    |
| 研究科室  | 科研创新部                                                                                                                                                                                                               |       | 主要研究者 | 周菁     |    |
| 审查方式  | <input type="checkbox"/> 会议审查 会议时间： 会议地点：<br><input checked="" type="checkbox"/> 快速审查 审查时间：2026年01月06日                                                                                                              |       |       |        |    |
| 审查委员  | 曾宪黎、罗星                                                                                                                                                                                                              |       |       |        |    |
| 审查文件  | 1.伦理递交信<br>2.研究者发起立项申请表<br>3.初始审查申请表（科研类项目）<br>4.学术审核表-科研创新部<br>5.研究方案（非干预性）（版本号：v1.0，版本日期：2025.12.19）<br>6.调查问卷（版本号：v1.0，版本日期：2025.12.19）<br>7.免除知情同意签字申请表（ <del>版本日期：2</del> ）<br>8.研究者简历<br>9.利益冲突声明<br>10.一致性声明 |       |       |        |    |
| 表决结果  | 批准                                                                                                                                                                                                                  | 修改后批准 | 修改后再审 | 不批准    |    |
|       | 2 票                                                                                                                                                                                                                 | 0 票   | 0 票   | 0 票    |    |
| 评审结论  | 批准                                                                                                                                                                                                                  |       |       |        |    |

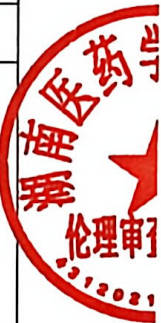

Supplement: Supplementary file 1 [file 88f5bc0b1c79a5256f76a705.pdf]
